# Supplementary material for: Association between EPHA5 methylation status in peripheral blood leukocytes and the risk and prognosis of gastric cancer
Source: PeerJ. 2022 Sep 21;10:e13774. doi: 10.7717/peerj.13774 (PMC9508887; doi:10.7717/peerj.13774)
Supplement: Supplemental Information 5 [file peerj-10-13774-s005.xlsx]

## Sheet: Sheet1
gastric_cancer	0	control
	1	case
EPHA5	1	negative
	2	positive
HP_infection	0	Negative
	1	Positive
sex	1	male
	2	female
age	1	<60
	2	≥60
BMI	1	<23.00
	2	≥23.00
monthly_income	1	<1000RMB/month
	2	≥1000MB/month
family_history_of_gastric_cancer	1	No
	2	Yes
regular_diet	1	No
	2	Yes
salted_food	1	dan/moderate
	2	xian
hot_food	1	No
	2	Yes
eating_speed	1	slow/moderate
	2	fast
green_vegetables	1	<250
	2	≥250
bean_products	1	≤2 times/week
	2	＞2 times/week
fruits	1	<1000g/week
	2	≥1000g/week
garlic	1	<once/week
	2	≥once/week
beef_and_mutton	1	<250g/week
	2	≥250g/week
pork	1	<250g/week
	2	≥250g/week
chicken	1	<250g/week
	2	≥250g/week
freshwater_fish	1	<once/week
	2	≥once/week
marine_product	1	<once/week
	2	≥once/week
dairy_products	1	<once/week
	2	≥once/week
tea	1	No
	2	Yes
fried_food	1	<once/week
	2	≥once/week
refrigerated_food	1	No
	2	Yes
smoking	1	No
	2	Yes
alcohol_consumption	1	No
	2	Yes
water	1	River-water and well-water
	2	Tap water and mineral-water
egg	1	≤6g/week
	2	≥7g/week
food_left_overnight	1	<once/week
	2	≥once/week
survival_state	0	dead
	1	withdraw
	2	alive
gastric_ulcer	1	No
	2	Yes
chronic_gastritis	1	No
	2	Yes
tumor_site	1	Distal stomach
	2	Others
tumor_size	1	<5cm
	2	≥5cm
pathological_typing	1	Polypoid type
	2	Ulcer type
	3	Infiltrating ulcer type
	4	Infiltrating type
	5	Other type
histological_type	1	adenocarcinoma
	2	Particular types carcinoma
	3	mixed carcinoma
differentiation	1	Low
	2	Middle to High
TNM_stage	1	Ⅰ
	2	Ⅱ
	3	Ⅲ
	4	Ⅳ
CA199	1	<37u/ml
	2	≥37u/ml
CEA	1	<5ng/ml
	2	≥5ng/ml
BMI	1	≤18.50
	2	18.50-23.00
	3	≥23.00
